# Supplementary material
Source: publisher figshare collection journal article supplement (https://acs.figshare.com/ndownloader/files/5155450)
Supplement: Supplementary file 1 [file 5155450]

  
data_dl32 
  
_audit_creation_method            SHELXTL 
_chemical_name_systematic 
; 
 ? 
; 
_chemical_name_common             ? 
_chemical_melting_point           ? 
_chemical_formula_moiety          ? 
_chemical_formula_sum 
 'C48 H120 K La N4 O6 Si8' 
_chemical_formula_weight          1252.21 
  
loop_ 
 _atom_type_symbol 
 _atom_type_description 
 _atom_type_scat_dispersion_real 
 _atom_type_scat_dispersion_imag 
 _atom_type_scat_source 
 'C'  'C'   0.0033   0.0016 
 'International Tables Vol C Tables 4.2.6.8 and 6.1.1.4' 
 'H'  'H'   0.0000   0.0000 
 'International Tables Vol C Tables 4.2.6.8 and 6.1.1.4' 
 'N'  'N'   0.0061   0.0033 
 'International Tables Vol C Tables 4.2.6.8 and 6.1.1.4' 
 'O'  'O'   0.0106   0.0060 
 'International Tables Vol C Tables 4.2.6.8 and 6.1.1.4' 
 'Si'  'Si'   0.0817   0.0704 
 'International Tables Vol C Tables 4.2.6.8 and 6.1.1.4' 
 'K'  'K'   0.2009   0.2494 
 'International Tables Vol C Tables 4.2.6.8 and 6.1.1.4' 
 'La'  'La'  -0.2871   2.4523 
 'International Tables Vol C Tables 4.2.6.8 and 6.1.1.4' 
  
_symmetry_cell_setting            Monoclinic 
_symmetry_space_group_name_H-M    C2/c 
  
loop_ 
 _symmetry_equiv_pos_as_xyz 
 'x, y, z' 
 '-x, y, -z+1/2' 
 'x+1/2, y+1/2, z' 
 '-x+1/2, y+1/2, -z+1/2' 
 '-x, -y, -z' 
 'x, -y, z-1/2' 
 '-x+1/2, -y+1/2, -z' 
 'x+1/2, -y+1/2, z-1/2' 
  
_cell_length_a                    26.623(3) 
_cell_length_b                    30.624(3) 
_cell_length_c                    17.3572(17) 
_cell_angle_alpha                 90.00 
_cell_angle_beta                  91.339(2) 
_cell_angle_gamma                 90.00 
_cell_volume                      14147(2) 
_cell_formula_units_Z             8 
_cell_measurement_temperature     163(2) 
_cell_measurement_reflns_used     ? 
_cell_measurement_theta_min       ? 
_cell_measurement_theta_max       ? 
  
_exptl_crystal_description        hexagonal 
_exptl_crystal_colour             colorless 
_exptl_crystal_size_max           0.31 
_exptl_crystal_size_mid           0.27 
_exptl_crystal_size_min           0.24 
_exptl_crystal_density_meas       n/a 
_exptl_crystal_density_diffrn     1.176 
_exptl_crystal_density_method     'not measured' 
_exptl_crystal_F_000              5376 
_exptl_absorpt_coefficient_mu     0.839 
_exptl_absorpt_correction_type    multi-scan 
_exptl_absorpt_correction_T_min   0.7810 
_exptl_absorpt_correction_T_max   0.8241 
_exptl_absorpt_process_details    'Bruker SADABS' 
  
_exptl_special_details 
; 
 ? 
; 
  
_diffrn_ambient_temperature       163(2) 
_diffrn_radiation_wavelength      0.71073 
_diffrn_radiation_type            MoK\a 
_diffrn_radiation_source          'sealed tube' 
_diffrn_radiation_monochromator   graphite 
_diffrn_measurement_device_type   'CCD area detector' 
_diffrn_measurement_method        'omega scans' 
_diffrn_detector_area_resol_mean  ? 
_diffrn_standards_number          '50 frames' 
_diffrn_standards_interval_count  'initial 50 frames recollected' 
_diffrn_standards_interval_time   ? 
_diffrn_standards_decay_%         '< 1.0' 
_diffrn_reflns_number             67725 
_diffrn_reflns_av_R_equivalents   0.0471 
_diffrn_reflns_av_sigmaI/netI     0.0399 
_diffrn_reflns_limit_h_min        -33 
_diffrn_reflns_limit_h_max        33 
_diffrn_reflns_limit_k_min        -38 
_diffrn_reflns_limit_k_max        38 
_diffrn_reflns_limit_l_min        -21 
_diffrn_reflns_limit_l_max        21 
_diffrn_reflns_theta_min          1.01 
_diffrn_reflns_theta_max          26.37 
_reflns_number_total              14432 
_reflns_number_gt                 10426 
_reflns_threshold_expression      >2sigma(I) 
  
_computing_data_collection        'Bruker SMART' 
_computing_cell_refinement        'Bruker SMART/SAINT' 
_computing_data_reduction         'Bruker SAINT' 
_computing_structure_solution     'Bruker SHELXTL' 
_computing_structure_refinement   'Bruker SHELXTL' 
_computing_molecular_graphics     'Bruker SHELXTL' 
_computing_publication_material   'Bruker SHELXTL' 
  
_refine_special_details 
; 
 Refinement of F^2^ against ALL reflections.  The weighted R-factor wR and 
 goodness of fit S are based on F^2^, conventional R-factors R are based 
 on F, with F set to zero for negative F^2^. The threshold expression of 
 F^2^ > 2sigma(F^2^) is used only for calculating R-factors(gt) etc. and is 
 not relevant to the choice of reflections for refinement.  R-factors based 
 on F^2^ are statistically about twice as large as those based on F, and R- 
 factors based on ALL data will be even larger. 
; 
  
_refine_ls_structure_factor_coef  Fsqd 
_refine_ls_matrix_type            full 
_refine_ls_weighting_scheme       calc 
_refine_ls_weighting_details 
 'calc w=1/[\s^2^(Fo^2^)+(0.1025P)^2^+138.7538P] where P=(Fo^2^+2Fc^2^)/3' 
_atom_sites_solution_primary      direct 
_atom_sites_solution_secondary    difmap 
_atom_sites_solution_hydrogens    geom 
_refine_ls_hydrogen_treatment     constr 
_refine_ls_extinction_method      none 
_refine_ls_extinction_coef        ? 
_refine_ls_number_reflns          14432 
_refine_ls_number_parameters      446 
_refine_ls_number_restraints      294 
_refine_ls_R_factor_all           0.0987 
_refine_ls_R_factor_gt            0.0662 
_refine_ls_wR_factor_ref          0.2144 
_refine_ls_wR_factor_gt           0.1806 
_refine_ls_goodness_of_fit_ref    1.060 
_refine_ls_restrained_S_all       1.068 
_refine_ls_shift/su_max           0.010 
_refine_ls_shift/su_mean          0.000 
  
loop_ 
 _atom_site_label 
 _atom_site_type_symbol 
 _atom_site_fract_x 
 _atom_site_fract_y 
 _atom_site_fract_z 
 _atom_site_U_iso_or_equiv 
 _atom_site_adp_type 
 _atom_site_occupancy 
 _atom_site_symmetry_multiplicity 
 _atom_site_calc_flag 
 _atom_site_refinement_flags 
 _atom_site_disorder_assembly 
 _atom_site_disorder_group 
La1 La 0.248160(11) 0.160459(10) 0.744993(17) 0.02699(12) Uani 1 1 d . . . 
Si1 Si 0.37049(7) 0.20232(7) 0.82585(11) 0.0467(5) Uani 1 1 d . . . 
Si2 Si 0.34406(7) 0.22801(6) 0.66685(11) 0.0410(4) Uani 1 1 d . . . 
Si3 Si 0.30502(8) 0.08700(6) 0.61068(11) 0.0435(4) Uani 1 1 d . . . 
Si4 Si 0.20595(8) 0.11596(7) 0.55321(10) 0.0453(4) Uani 1 1 d . . . 
Si5 Si 0.22571(7) 0.14233(7) 0.94480(10) 0.0475(5) Uani 1 1 d . . . 
Si6 Si 0.24123(7) 0.05925(6) 0.86479(11) 0.0445(4) Uani 1 1 d . . . 
Si7 Si 0.11549(7) 0.18239(7) 0.75889(13) 0.0497(5) Uani 1 1 d . . . 
Si8 Si 0.17388(8) 0.26300(7) 0.73817(17) 0.0643(7) Uani 1 1 d . . . 
N1 N 0.32875(18) 0.20040(16) 0.7488(3) 0.0356(11) Uani 1 1 d . . . 
N2 N 0.2518(2) 0.11706(16) 0.6252(3) 0.0357(11) Uani 1 1 d . . . 
N3 N 0.23806(18) 0.11499(17) 0.8610(3) 0.0356(11) Uani 1 1 d . . . 
N4 N 0.17240(19) 0.20703(17) 0.7465(4) 0.0443(13) Uani 1 1 d . . . 
C1 C 0.3608(3) 0.2510(3) 0.8897(5) 0.082(3) Uani 1 1 d . . . 
H1A H 0.3258 0.2518 0.9060 0.123 Uiso 1 1 calc R . . 
H1B H 0.3682 0.2778 0.8611 0.123 Uiso 1 1 calc R . . 
H1C H 0.3832 0.2490 0.9351 0.123 Uiso 1 1 calc R . . 
C2 C 0.3673(3) 0.1516(3) 0.8864(5) 0.067(2) Uani 1 1 d . . . 
H2A H 0.3722 0.1259 0.8538 0.100 Uiso 1 1 calc R . . 
H2B H 0.3344 0.1499 0.9102 0.100 Uiso 1 1 calc R . . 
H2C H 0.3937 0.1526 0.9267 0.100 Uiso 1 1 calc R . . 
C3 C 0.4384(3) 0.2054(3) 0.8002(5) 0.0569(19) Uani 1 1 d . . . 
H3A H 0.4465 0.1810 0.7661 0.085 Uiso 1 1 calc R . . 
H3B H 0.4594 0.2037 0.8472 0.085 Uiso 1 1 calc R . . 
H3C H 0.4448 0.2331 0.7738 0.085 Uiso 1 1 calc R . . 
C4 C 0.2891(3) 0.2263(2) 0.5974(5) 0.0535(18) Uani 1 1 d . . . 
H4A H 0.2592 0.2378 0.6225 0.080 Uiso 1 1 calc R . . 
H4B H 0.2829 0.1961 0.5813 0.080 Uiso 1 1 calc R . . 
H4C H 0.2964 0.2441 0.5521 0.080 Uiso 1 1 calc R . . 
C5 C 0.3994(3) 0.2055(3) 0.6140(4) 0.0515(17) Uani 1 1 d . . . 
H5A H 0.3941 0.1743 0.6038 0.077 Uiso 1 1 calc R . . 
H5B H 0.4301 0.2094 0.6456 0.077 Uiso 1 1 calc R . . 
H5C H 0.4028 0.2211 0.5651 0.077 Uiso 1 1 calc R . . 
C6 C 0.3599(3) 0.2876(2) 0.6818(5) 0.059(2) Uani 1 1 d . . . 
H6A H 0.3328 0.3019 0.7094 0.088 Uiso 1 1 calc R . . 
H6B H 0.3639 0.3017 0.6316 0.088 Uiso 1 1 calc R . . 
H6C H 0.3913 0.2901 0.7121 0.088 Uiso 1 1 calc R . . 
C7 C 0.2935(4) 0.0272(3) 0.5874(5) 0.071(2) Uani 1 1 d . . . 
H7A H 0.2722 0.0143 0.6268 0.106 Uiso 1 1 calc R . . 
H7B H 0.3257 0.0117 0.5866 0.106 Uiso 1 1 calc R . . 
H7C H 0.2766 0.0247 0.5368 0.106 Uiso 1 1 calc R . . 
C8 C 0.3456(3) 0.1060(3) 0.5297(4) 0.0562(19) Uani 1 1 d . . . 
H8A H 0.3260 0.1057 0.4812 0.084 Uiso 1 1 calc R . . 
H8B H 0.3746 0.0865 0.5254 0.084 Uiso 1 1 calc R . . 
H8C H 0.3574 0.1358 0.5404 0.084 Uiso 1 1 calc R . . 
C9 C 0.3458(3) 0.0885(2) 0.7005(4) 0.0495(17) Uani 1 1 d . . . 
H9A H 0.3264 0.0788 0.7445 0.074 Uiso 1 1 calc R . . 
H9B H 0.3577 0.1184 0.7095 0.074 Uiso 1 1 calc R . . 
H9C H 0.3747 0.0691 0.6942 0.074 Uiso 1 1 calc R . . 
C10 C 0.2297(4) 0.1105(4) 0.4524(4) 0.074(3) Uani 1 1 d . . . 
H10A H 0.2496 0.0837 0.4485 0.111 Uiso 1 1 calc R . . 
H10B H 0.2508 0.1357 0.4405 0.111 Uiso 1 1 calc R . . 
H10C H 0.2012 0.1092 0.4158 0.111 Uiso 1 1 calc R . . 
C11 C 0.1690(3) 0.1681(3) 0.5514(5) 0.063(2) Uani 1 1 d . . . 
H11A H 0.1550 0.1732 0.6023 0.095 Uiso 1 1 calc R . . 
H11B H 0.1416 0.1658 0.5129 0.095 Uiso 1 1 calc R . . 
H11C H 0.1910 0.1924 0.5380 0.095 Uiso 1 1 calc R . . 
C12 C 0.1602(3) 0.0691(3) 0.5630(4) 0.061(2) Uani 1 1 d . . . 
H12A H 0.1458 0.0696 0.6145 0.091 Uiso 1 1 calc R . . 
H12B H 0.1778 0.0414 0.5555 0.091 Uiso 1 1 calc R . . 
H12C H 0.1331 0.0719 0.5240 0.091 Uiso 1 1 calc R . . 
C13 C 0.2686(3) 0.1278(4) 1.0288(4) 0.084(3) Uani 1 1 d . . . 
H13A H 0.2666 0.0963 1.0387 0.126 Uiso 1 1 calc R . . 
H13B H 0.2583 0.1438 1.0747 0.126 Uiso 1 1 calc R . . 
H13C H 0.3033 0.1356 1.0168 0.126 Uiso 1 1 calc R . . 
C14 C 0.2309(3) 0.2022(3) 0.9283(5) 0.068(3) Uani 1 1 d . . . 
H14A H 0.2643 0.2090 0.9089 0.102 Uiso 1 1 calc R . . 
H14B H 0.2260 0.2177 0.9769 0.102 Uiso 1 1 calc R . . 
H14C H 0.2052 0.2114 0.8904 0.102 Uiso 1 1 calc R . . 
C15 C 0.1605(3) 0.1333(3) 0.9815(4) 0.0528(18) Uani 1 1 d . . . 
H15A H 0.1556 0.1022 0.9920 0.079 Uiso 1 1 calc R . . 
H15B H 0.1357 0.1430 0.9426 0.079 Uiso 1 1 calc R . . 
H15C H 0.1562 0.1500 1.0291 0.079 Uiso 1 1 calc R . . 
C16 C 0.3048(3) 0.0383(3) 0.8955(5) 0.068(2) Uani 1 1 d . . . 
H16A H 0.3145 0.0510 0.9455 0.103 Uiso 1 1 calc R . . 
H16B H 0.3295 0.0466 0.8571 0.103 Uiso 1 1 calc R . . 
H16C H 0.3037 0.0064 0.9000 0.103 Uiso 1 1 calc R . . 
C17 C 0.2229(4) 0.0347(2) 0.7695(4) 0.060(2) Uani 1 1 d . . . 
H17A H 0.1896 0.0455 0.7533 0.090 Uiso 1 1 calc R . . 
H17B H 0.2219 0.0028 0.7742 0.090 Uiso 1 1 calc R . . 
H17C H 0.2475 0.0430 0.7310 0.090 Uiso 1 1 calc R . . 
C18 C 0.1968(3) 0.0321(3) 0.9329(5) 0.058(2) Uani 1 1 d . . . 
H18A H 0.1623 0.0413 0.9205 0.088 Uiso 1 1 calc R . . 
H18B H 0.2057 0.0405 0.9860 0.088 Uiso 1 1 calc R . . 
H18C H 0.1994 0.0003 0.9276 0.088 Uiso 1 1 calc R . . 
C19 C 0.0665(3) 0.1963(4) 0.6827(6) 0.086(3) Uani 1 1 d . . . 
H19A H 0.0610 0.2280 0.6820 0.129 Uiso 1 1 calc R . . 
H19B H 0.0350 0.1814 0.6942 0.129 Uiso 1 1 calc R . . 
H19C H 0.0781 0.1868 0.6322 0.129 Uiso 1 1 calc R . . 
C20 C 0.0835(3) 0.1963(3) 0.8513(5) 0.063(2) Uani 1 1 d . . . 
H20A H 0.1065 0.1905 0.8950 0.094 Uiso 1 1 calc R . . 
H20B H 0.0532 0.1785 0.8559 0.094 Uiso 1 1 calc R . . 
H20C H 0.0743 0.2273 0.8509 0.094 Uiso 1 1 calc R . . 
C21 C 0.1239(3) 0.1215(2) 0.7569(4) 0.0518(18) Uani 1 1 d . . . 
H21A H 0.1491 0.1129 0.7961 0.078 Uiso 1 1 calc R . . 
H21B H 0.1353 0.1126 0.7059 0.078 Uiso 1 1 calc R . . 
H21C H 0.0919 0.1072 0.7675 0.078 Uiso 1 1 calc R . . 
C22 C 0.1264(3) 0.2916(3) 0.7990(8) 0.095(4) Uani 1 1 d . . . 
H22A H 0.0926 0.2813 0.7846 0.142 Uiso 1 1 calc R . . 
H22B H 0.1285 0.3232 0.7906 0.142 Uiso 1 1 calc R . . 
H22C H 0.1334 0.2851 0.8535 0.142 Uiso 1 1 calc R . . 
C23 C 0.1622(3) 0.2826(3) 0.6372(7) 0.084(3) Uani 1 1 d . . . 
H23A H 0.1303 0.2707 0.6173 0.125 Uiso 1 1 calc R . . 
H23B H 0.1895 0.2728 0.6046 0.125 Uiso 1 1 calc R . . 
H23C H 0.1606 0.3146 0.6367 0.125 Uiso 1 1 calc R . . 
C24 C 0.2352(3) 0.2866(2) 0.7734(6) 0.074(3) Uani 1 1 d . . . 
H24A H 0.2627 0.2735 0.7448 0.111 Uiso 1 1 calc R . . 
H24B H 0.2399 0.2802 0.8285 0.111 Uiso 1 1 calc R . . 
H24C H 0.2350 0.3182 0.7655 0.111 Uiso 1 1 calc R . . 
K1 K 0.0000 -0.07069(7) 0.7500 0.0541(6) Uani 1 2 d S . . 
O1 O 0.0073(2) -0.0078(2) 0.8584(4) 0.0751(17) Uiso 1 1 d D . . 
C25 C 0.0527(3) 0.0108(3) 0.8900(6) 0.0802(13) Uiso 1 1 d D . . 
H25A H 0.0773 0.0156 0.8490 0.096 Uiso 1 1 calc R . . 
H25B H 0.0679 -0.0089 0.9294 0.096 Uiso 1 1 calc R . . 
C26 C 0.0380(4) 0.0530(3) 0.9254(6) 0.0802(13) Uiso 1 1 d D . . 
H26A H 0.0294 0.0491 0.9801 0.096 Uiso 1 1 calc R . . 
H26B H 0.0654 0.0747 0.9220 0.096 Uiso 1 1 calc R . . 
C27 C -0.0061(4) 0.0665(3) 0.8791(6) 0.0802(13) Uiso 1 1 d D . . 
H27A H 0.0039 0.0817 0.8315 0.096 Uiso 1 1 calc R . . 
H27B H -0.0282 0.0859 0.9089 0.096 Uiso 1 1 calc R . . 
C28 C -0.0313(3) 0.0248(3) 0.8609(6) 0.0802(13) Uiso 1 1 d D . . 
H28A H -0.0557 0.0175 0.9010 0.096 Uiso 1 1 calc R . . 
H28B H -0.0494 0.0267 0.8105 0.096 Uiso 1 1 calc R . . 
O2 O 0.0986(2) -0.0647(2) 0.7322(4) 0.0777(17) Uiso 1 1 d D . . 
C29 C 0.1217(4) -0.0672(4) 0.6595(6) 0.0960(17) Uiso 1 1 d D . . 
H29A H 0.1172 -0.0393 0.6313 0.115 Uiso 1 1 calc R . . 
H29B H 0.1062 -0.0909 0.6283 0.115 Uiso 1 1 calc R . . 
C30 C 0.1743(4) -0.0759(4) 0.6727(6) 0.0960(17) Uiso 1 1 d D . . 
H30A H 0.1943 -0.0491 0.6647 0.115 Uiso 1 1 calc R . . 
H30B H 0.1859 -0.0987 0.6367 0.115 Uiso 1 1 calc R . . 
C31 C 0.1800(4) -0.0908(4) 0.7515(6) 0.0960(17) Uiso 1 1 d D . . 
H31A H 0.2090 -0.0761 0.7773 0.115 Uiso 1 1 calc R . . 
H31B H 0.1857 -0.1227 0.7530 0.115 Uiso 1 1 calc R . . 
C32 C 0.1334(4) -0.0797(4) 0.7898(6) 0.0960(17) Uiso 1 1 d D . . 
H32A H 0.1199 -0.1057 0.8162 0.115 Uiso 1 1 calc R . . 
H32B H 0.1397 -0.0566 0.8288 0.115 Uiso 1 1 calc R . . 
O3 O 0.0104(3) -0.1347(2) 0.8534(4) 0.098(2) Uiso 1 1 d D . . 
C33 C 0.0339(5) -0.1294(4) 0.9260(7) 0.116(2) Uiso 1 1 d D . . 
H33A H 0.0247 -0.1010 0.9487 0.140 Uiso 1 1 calc R . . 
H33B H 0.0709 -0.1307 0.9216 0.140 Uiso 1 1 calc R . . 
C34 C 0.0162(6) -0.1653(4) 0.9735(7) 0.116(2) Uiso 1 1 d D . . 
H34A H 0.0450 -0.1791 1.0010 0.140 Uiso 1 1 calc R . . 
H34B H -0.0071 -0.1540 1.0123 0.140 Uiso 1 1 calc R . . 
C35 C -0.0084(5) -0.1962(4) 0.9265(7) 0.116(2) Uiso 1 1 d D . . 
H35A H -0.0431 -0.2009 0.9441 0.140 Uiso 1 1 calc R . . 
H35B H 0.0097 -0.2244 0.9285 0.140 Uiso 1 1 calc R . . 
C36 C -0.0093(5) -0.1788(4) 0.8482(7) 0.116(2) Uiso 1 1 d D . . 
H36A H 0.0119 -0.1969 0.8146 0.140 Uiso 1 1 calc R . . 
H36B H -0.0440 -0.1786 0.8266 0.140 Uiso 1 1 calc R . . 
K2 K 0.5000 -0.06787(9) 0.7500 0.0689(7) Uani 1 2 d S . . 
O4 O 0.5026(4) -0.1281(3) 0.6380(6) 0.140(3) Uiso 1 1 d D . . 
C37 C 0.4650(6) -0.1328(5) 0.5782(9) 0.143(3) Uiso 1 1 d D . . 
H37A H 0.4635 -0.1065 0.5452 0.171 Uiso 1 1 calc R . . 
H37B H 0.4315 -0.1376 0.6004 0.171 Uiso 1 1 calc R . . 
C38 C 0.4803(6) -0.1707(5) 0.5341(8) 0.143(3) Uiso 1 1 d D . . 
H38A H 0.4504 -0.1883 0.5189 0.171 Uiso 1 1 calc R . . 
H38B H 0.4971 -0.1612 0.4866 0.171 Uiso 1 1 calc R . . 
C39 C 0.5139(6) -0.1960(5) 0.5809(9) 0.143(3) Uiso 1 1 d D . . 
H39A H 0.5479 -0.1961 0.5593 0.171 Uiso 1 1 calc R . . 
H39B H 0.5019 -0.2265 0.5848 0.171 Uiso 1 1 calc R . . 
C40 C 0.5141(6) -0.1750(4) 0.6553(8) 0.143(3) Uiso 1 1 d D . . 
H40A H 0.5474 -0.1779 0.6815 0.171 Uiso 1 1 calc R . . 
H40B H 0.4883 -0.1878 0.6886 0.171 Uiso 1 1 calc R . . 
O5 O 0.4941(6) -0.0064(4) 0.8596(8) 0.179(5) Uiso 1 1 d D . . 
C41 C 0.4486(7) 0.0098(8) 0.8944(16) 0.278(7) Uiso 1 1 d D . . 
H41A H 0.4349 -0.0119 0.9308 0.334 Uiso 1 1 calc R . . 
H41B H 0.4225 0.0167 0.8547 0.334 Uiso 1 1 calc R . . 
C42 C 0.4657(10) 0.0496(8) 0.9353(14) 0.278(7) Uiso 1 1 d D . . 
H42A H 0.4374 0.0696 0.9455 0.334 Uiso 1 1 calc R . . 
H42B H 0.4836 0.0425 0.9844 0.334 Uiso 1 1 calc R . . 
C43 C 0.5000(10) 0.0680(6) 0.8785(17) 0.278(7) Uiso 1 1 d D . . 
H43A H 0.5210 0.0917 0.9008 0.334 Uiso 1 1 calc R . . 
H43B H 0.4816 0.0790 0.8322 0.334 Uiso 1 1 calc R . . 
C44 C 0.5299(7) 0.0288(8) 0.8613(17) 0.278(7) Uiso 1 1 d D . . 
H44A H 0.5463 0.0318 0.8109 0.334 Uiso 1 1 calc R . . 
H44B H 0.5561 0.0239 0.9018 0.334 Uiso 1 1 calc R . . 
O6 O 0.4009(3) -0.0654(3) 0.7446(5) 0.104(2) Uiso 1 1 d D . . 
C45 C 0.3686(4) -0.0691(5) 0.6789(6) 0.112(2) Uiso 1 1 d D . . 
H45A H 0.3804 -0.0925 0.6444 0.134 Uiso 1 1 calc R . . 
H45B H 0.3676 -0.0413 0.6499 0.134 Uiso 1 1 calc R . . 
C46 C 0.3189(4) -0.0795(5) 0.7073(7) 0.112(2) Uiso 1 1 d D . . 
H46A H 0.2947 -0.0563 0.6922 0.134 Uiso 1 1 calc R . . 
H46B H 0.3069 -0.1075 0.6848 0.134 Uiso 1 1 calc R . . 
C47 C 0.3221(4) -0.0830(5) 0.7890(7) 0.112(2) Uiso 1 1 d D . . 
H47A H 0.3068 -0.0571 0.8133 0.134 Uiso 1 1 calc R . . 
H47B H 0.3042 -0.1094 0.8065 0.134 Uiso 1 1 calc R . . 
C48 C 0.3740(4) -0.0857(4) 0.8092(7) 0.112(2) Uiso 1 1 d D . . 
H48A H 0.3843 -0.1166 0.8158 0.134 Uiso 1 1 calc R . . 
H48B H 0.3813 -0.0699 0.8579 0.134 Uiso 1 1 calc R . . 
  
loop_ 
 _atom_site_aniso_label 
 _atom_site_aniso_U_11 
 _atom_site_aniso_U_22 
 _atom_site_aniso_U_33 
 _atom_site_aniso_U_23 
 _atom_site_aniso_U_13 
 _atom_site_aniso_U_12 
La1 0.02626(18) 0.02456(18) 0.03025(19) -0.00188(12) 0.00315(12) -0.00252(12) 
Si1 0.0289(9) 0.0673(13) 0.0440(10) -0.0125(9) 0.0048(7) -0.0131(8) 
Si2 0.0347(9) 0.0365(9) 0.0521(11) 0.0007(8) 0.0071(8) -0.0064(7) 
Si3 0.0571(12) 0.0386(10) 0.0350(9) -0.0065(7) 0.0079(8) 0.0022(8) 
Si4 0.0510(11) 0.0534(11) 0.0314(9) -0.0019(8) -0.0023(8) -0.0151(9) 
Si5 0.0436(10) 0.0686(13) 0.0304(9) -0.0121(8) 0.0064(7) -0.0151(9) 
Si6 0.0489(11) 0.0427(10) 0.0422(10) 0.0140(8) 0.0080(8) 0.0035(8) 
Si7 0.0292(9) 0.0492(11) 0.0706(13) 0.0121(10) 0.0021(9) -0.0032(8) 
Si8 0.0404(11) 0.0326(10) 0.121(2) 0.0071(11) 0.0264(12) 0.0057(8) 
N1 0.029(2) 0.036(3) 0.042(3) -0.007(2) 0.005(2) -0.006(2) 
N2 0.046(3) 0.030(3) 0.030(3) -0.0035(19) 0.002(2) -0.004(2) 
N3 0.034(3) 0.042(3) 0.031(3) 0.001(2) 0.002(2) -0.005(2) 
N4 0.028(3) 0.034(3) 0.071(4) 0.005(3) 0.008(3) 0.000(2) 
C1 0.052(5) 0.116(8) 0.078(6) -0.053(6) 0.012(4) -0.033(5) 
C2 0.046(4) 0.104(7) 0.050(4) 0.012(4) -0.007(3) -0.018(4) 
C3 0.035(4) 0.079(6) 0.057(5) -0.001(4) 0.001(3) -0.009(4) 
C4 0.049(4) 0.046(4) 0.065(5) 0.019(3) 0.002(3) -0.003(3) 
C5 0.043(4) 0.060(5) 0.053(4) 0.001(3) 0.016(3) -0.005(3) 
C6 0.053(4) 0.041(4) 0.083(6) 0.002(4) 0.013(4) -0.013(3) 
C7 0.099(7) 0.048(5) 0.066(5) -0.019(4) 0.019(5) 0.004(4) 
C8 0.057(4) 0.074(5) 0.038(4) -0.009(3) 0.015(3) -0.002(4) 
C9 0.056(4) 0.047(4) 0.047(4) -0.002(3) 0.007(3) 0.011(3) 
C10 0.077(6) 0.112(8) 0.034(4) -0.004(4) 0.003(4) -0.029(5) 
C11 0.057(5) 0.069(5) 0.062(5) 0.017(4) -0.025(4) -0.007(4) 
C12 0.064(5) 0.069(5) 0.050(4) -0.017(4) 0.004(4) -0.026(4) 
C13 0.059(5) 0.158(10) 0.034(4) -0.009(5) -0.001(4) -0.020(6) 
C14 0.069(5) 0.069(5) 0.068(5) -0.038(4) 0.030(4) -0.034(4) 
C15 0.051(4) 0.068(5) 0.040(4) -0.005(3) 0.012(3) -0.009(4) 
C16 0.063(5) 0.071(5) 0.072(5) 0.035(4) 0.018(4) 0.020(4) 
C17 0.093(6) 0.033(4) 0.055(4) 0.000(3) 0.018(4) 0.003(4) 
C18 0.064(5) 0.054(4) 0.057(5) 0.022(4) 0.011(4) -0.003(4) 
C19 0.036(4) 0.116(8) 0.106(8) 0.048(7) -0.009(4) -0.008(5) 
C20 0.040(4) 0.054(5) 0.094(6) 0.007(4) 0.020(4) 0.003(3) 
C21 0.048(4) 0.058(4) 0.049(4) -0.003(3) -0.005(3) -0.023(3) 
C22 0.061(5) 0.041(4) 0.185(12) -0.002(6) 0.053(7) 0.009(4) 
C23 0.054(5) 0.049(5) 0.148(10) 0.036(5) 0.024(6) 0.012(4) 
C24 0.052(5) 0.034(4) 0.138(9) -0.012(5) 0.032(5) -0.009(3) 
K1 0.0386(11) 0.0452(12) 0.0779(16) 0.000 -0.0152(10) 0.000 
K2 0.0325(11) 0.0722(17) 0.102(2) 0.000 0.0068(12) 0.000 
  
_geom_special_details 
; 
 All esds (except the esd in the dihedral angle between two l.s. planes) 
 are estimated using the full covariance matrix.  The cell esds are taken 
 into account individually in the estimation of esds in distances, angles 
 and torsion angles; correlations between esds in cell parameters are only 
 used when they are defined by crystal symmetry.  An approximate (isotropic) 
 treatment of cell esds is used for estimating esds involving l.s. planes. 
; 
  
loop_ 
 _geom_bond_atom_site_label_1 
 _geom_bond_atom_site_label_2 
 _geom_bond_distance 
 _geom_bond_site_symmetry_2 
 _geom_bond_publ_flag 
La1 N3 2.468(5) . ? 
La1 N1 2.469(5) . ? 
La1 N4 2.471(5) . ? 
La1 N2 2.472(5) . ? 
Si1 N1 1.720(5) . ? 
Si1 C3 1.875(7) . ? 
Si1 C2 1.878(9) . ? 
Si1 C1 1.880(9) . ? 
Si2 N1 1.712(5) . ? 
Si2 C4 1.875(8) . ? 
Si2 C5 1.884(7) . ? 
Si2 C6 1.890(7) . ? 
Si3 N2 1.714(6) . ? 
Si3 C9 1.879(8) . ? 
Si3 C8 1.885(7) . ? 
Si3 C7 1.899(8) . ? 
Si4 N2 1.726(5) . ? 
Si4 C11 1.874(9) . ? 
Si4 C10 1.882(8) . ? 
Si4 C12 1.894(7) . ? 
Si5 N3 1.717(5) . ? 
Si5 C14 1.861(9) . ? 
Si5 C15 1.885(7) . ? 
Si5 C13 1.885(9) . ? 
Si6 N3 1.710(6) . ? 
Si6 C17 1.871(8) . ? 
Si6 C16 1.876(8) . ? 
Si6 C18 1.885(7) . ? 
Si7 N4 1.711(5) . ? 
Si7 C21 1.879(8) . ? 
Si7 C20 1.882(9) . ? 
Si7 C19 1.885(9) . ? 
Si8 N4 1.721(6) . ? 
Si8 C23 1.872(11) . ? 
Si8 C24 1.874(9) . ? 
Si8 C22 1.881(9) . ? 
K1 O2 2.657(6) . ? 
K1 O2 2.657(6) 2_556 ? 
K1 O3 2.668(8) 2_556 ? 
K1 O3 2.668(8) . ? 
K1 O1 2.696(6) . ? 
K1 O1 2.696(6) 2_556 ? 
O1 C28 1.432(9) . ? 
O1 C25 1.434(9) . ? 
C25 C26 1.488(10) . ? 
C26 C27 1.467(11) . ? 
C27 C28 1.473(10) . ? 
O2 C29 1.417(10) . ? 
O2 C32 1.424(10) . ? 
C29 C30 1.439(11) . ? 
C30 C31 1.445(11) . ? 
C31 C32 1.462(11) . ? 
O3 C33 1.402(10) . ? 
O3 C36 1.451(11) . ? 
C33 C34 1.458(12) . ? 
C34 C35 1.402(12) . ? 
C35 C36 1.459(12) . ? 
K2 O6 2.638(8) 2_656 ? 
K2 O6 2.638(8) . ? 
K2 O4 2.682(10) 2_656 ? 
K2 O4 2.682(10) . ? 
K2 O5 2.685(13) . ? 
K2 O5 2.685(13) 2_656 ? 
O4 C37 1.433(12) . ? 
O4 C40 1.498(12) . ? 
C37 C38 1.452(12) . ? 
C38 C39 1.425(13) . ? 
C39 C40 1.444(12) . ? 
O5 C44 1.439(14) . ? 
O5 C41 1.453(13) . ? 
C41 C42 1.477(14) . ? 
C42 C43 1.471(16) . ? 
C43 C44 1.475(14) . ? 
O6 C45 1.416(10) . ? 
O6 C48 1.482(11) . ? 
C45 C46 1.458(11) . ? 
C46 C47 1.422(12) . ? 
C47 C48 1.421(12) . ? 
  
loop_ 
 _geom_angle_atom_site_label_1 
 _geom_angle_atom_site_label_2 
 _geom_angle_atom_site_label_3 
 _geom_angle 
 _geom_angle_site_symmetry_1 
 _geom_angle_site_symmetry_3 
 _geom_angle_publ_flag 
N3 La1 N1 111.64(17) . . ? 
N3 La1 N4 102.27(18) . . ? 
N1 La1 N4 115.01(18) . . ? 
N3 La1 N2 112.96(17) . . ? 
N1 La1 N2 103.77(16) . . ? 
N4 La1 N2 111.54(19) . . ? 
N1 Si1 C3 115.2(3) . . ? 
N1 Si1 C2 111.7(3) . . ? 
C3 Si1 C2 103.4(4) . . ? 
N1 Si1 C1 113.0(4) . . ? 
C3 Si1 C1 104.3(4) . . ? 
C2 Si1 C1 108.6(5) . . ? 
N1 Si2 C4 108.8(3) . . ? 
N1 Si2 C5 115.3(3) . . ? 
C4 Si2 C5 106.5(4) . . ? 
N1 Si2 C6 114.8(3) . . ? 
C4 Si2 C6 106.5(4) . . ? 
C5 Si2 C6 104.2(3) . . ? 
N2 Si3 C9 109.2(3) . . ? 
N2 Si3 C8 115.7(3) . . ? 
C9 Si3 C8 106.3(4) . . ? 
N2 Si3 C7 114.8(4) . . ? 
C9 Si3 C7 106.7(4) . . ? 
C8 Si3 C7 103.5(4) . . ? 
N2 Si4 C11 111.0(3) . . ? 
N2 Si4 C10 115.3(4) . . ? 
C11 Si4 C10 104.3(4) . . ? 
N2 Si4 C12 113.3(3) . . ? 
C11 Si4 C12 107.9(4) . . ? 
C10 Si4 C12 104.3(4) . . ? 
N3 Si5 C14 109.5(3) . . ? 
N3 Si5 C15 114.3(3) . . ? 
C14 Si5 C15 105.6(4) . . ? 
N3 Si5 C13 114.5(4) . . ? 
C14 Si5 C13 107.8(5) . . ? 
C15 Si5 C13 104.5(4) . . ? 
N3 Si6 C17 110.8(3) . . ? 
N3 Si6 C16 113.3(4) . . ? 
C17 Si6 C16 109.2(4) . . ? 
N3 Si6 C18 115.7(3) . . ? 
C17 Si6 C18 102.9(4) . . ? 
C16 Si6 C18 104.2(4) . . ? 
N4 Si7 C21 109.2(3) . . ? 
N4 Si7 C20 115.2(3) . . ? 
C21 Si7 C20 107.3(4) . . ? 
N4 Si7 C19 114.3(4) . . ? 
C21 Si7 C19 107.0(4) . . ? 
C20 Si7 C19 103.1(4) . . ? 
N4 Si8 C23 113.2(4) . . ? 
N4 Si8 C24 112.2(3) . . ? 
C23 Si8 C24 107.9(4) . . ? 
N4 Si8 C22 113.5(4) . . ? 
C23 Si8 C22 106.1(5) . . ? 
C24 Si8 C22 103.2(5) . . ? 
Si2 N1 Si1 117.8(3) . . ? 
Si2 N1 La1 116.5(3) . . ? 
Si1 N1 La1 125.7(3) . . ? 
Si3 N2 Si4 117.1(3) . . ? 
Si3 N2 La1 117.5(3) . . ? 
Si4 N2 La1 125.4(3) . . ? 
Si6 N3 Si5 117.7(3) . . ? 
Si6 N3 La1 126.0(3) . . ? 
Si5 N3 La1 116.3(3) . . ? 
Si7 N4 Si8 118.2(3) . . ? 
Si7 N4 La1 118.2(3) . . ? 
Si8 N4 La1 123.6(3) . . ? 
O2 K1 O2 172.1(3) . 2_556 ? 
O2 K1 O3 93.4(2) . 2_556 ? 
O2 K1 O3 92.4(2) 2_556 2_556 ? 
O2 K1 O3 92.4(2) . . ? 
O2 K1 O3 93.4(2) 2_556 . ? 
O3 K1 O3 85.4(3) 2_556 . ? 
O2 K1 O1 88.7(2) . . ? 
O2 K1 O1 85.7(2) 2_556 . ? 
O3 K1 O1 177.4(2) 2_556 . ? 
O3 K1 O1 92.9(2) . . ? 
O2 K1 O1 85.7(2) . 2_556 ? 
O2 K1 O1 88.7(2) 2_556 2_556 ? 
O3 K1 O1 92.9(2) 2_556 2_556 ? 
O3 K1 O1 177.4(2) . 2_556 ? 
O1 K1 O1 88.8(3) . 2_556 ? 
C28 O1 C25 108.1(6) . . ? 
C28 O1 K1 118.6(5) . . ? 
C25 O1 K1 126.6(5) . . ? 
O1 C25 C26 106.0(7) . . ? 
C27 C26 C25 103.5(7) . . ? 
C26 C27 C28 103.2(7) . . ? 
O1 C28 C27 106.7(7) . . ? 
C29 O2 C32 108.6(7) . . ? 
C29 O2 K1 123.3(6) . . ? 
C32 O2 K1 121.6(6) . . ? 
O2 C29 C30 108.0(8) . . ? 
C29 C30 C31 106.8(8) . . ? 
C30 C31 C32 106.7(8) . . ? 
O2 C32 C31 107.4(8) . . ? 
C33 O3 C36 108.4(8) . . ? 
C33 O3 K1 123.8(7) . . ? 
C36 O3 K1 127.6(6) . . ? 
O3 C33 C34 106.2(9) . . ? 
C35 C34 C33 109.4(10) . . ? 
C34 C35 C36 107.0(9) . . ? 
O3 C36 C35 106.5(9) . . ? 
O6 K2 O6 176.7(4) 2_656 . ? 
O6 K2 O4 92.1(3) 2_656 2_656 ? 
O6 K2 O4 90.1(3) . 2_656 ? 
O6 K2 O4 90.1(3) 2_656 . ? 
O6 K2 O4 92.1(3) . . ? 
O4 K2 O4 93.2(5) 2_656 . ? 
O6 K2 O5 91.7(4) 2_656 . ? 
O6 K2 O5 86.0(4) . . ? 
O4 K2 O5 88.0(4) 2_656 . ? 
O4 K2 O5 177.8(4) . . ? 
O6 K2 O5 86.0(4) 2_656 2_656 ? 
O6 K2 O5 91.7(4) . 2_656 ? 
O4 K2 O5 177.8(4) 2_656 2_656 ? 
O4 K2 O5 88.0(4) . 2_656 ? 
O5 K2 O5 90.9(6) . 2_656 ? 
C37 O4 C40 100.6(10) . . ? 
C37 O4 K2 124.5(8) . . ? 
C40 O4 K2 121.5(8) . . ? 
O4 C37 C38 105.3(10) . . ? 
C39 C38 C37 108.3(10) . . ? 
C38 C39 C40 104.9(10) . . ? 
C39 C40 O4 104.6(10) . . ? 
C44 O5 C41 107.2(12) . . ? 
C44 O5 K2 119.3(13) . . ? 
C41 O5 K2 126.6(13) . . ? 
O5 C41 C42 103.2(13) . . ? 
C43 C42 C41 100.7(14) . . ? 
C42 C43 C44 99.8(14) . . ? 
O5 C44 C43 104.6(13) . . ? 
C45 O6 C48 106.2(8) . . ? 
C45 O6 K2 127.9(7) . . ? 
C48 O6 K2 117.5(6) . . ? 
O6 C45 C46 106.5(9) . . ? 
C47 C46 C45 108.7(9) . . ? 
C48 C47 C46 106.6(9) . . ? 
C47 C48 O6 105.9(9) . . ? 
  
_diffrn_measured_fraction_theta_max    0.997 
_diffrn_reflns_theta_full              26.37 
_diffrn_measured_fraction_theta_full   0.997 
_refine_diff_density_max    2.010 
_refine_diff_density_min   -1.299 
_refine_diff_density_rms    0.139 
  
